# Supplementary material for: Ultrasonic Synthesis, Molecular Structure and Mechanistic Study of 1,3-Dipolar Cycloaddition Reaction of 1-Alkynylpyridinium-3-olate and Acetylene Derivatives
Source: PubMed Central journal article supplement (PMC6274580; doi:10.3390/molecules21070848), 2016-06-29
Supplement: molecules-21-00848-s001.pdf [file molecules-21-00848-s001.pdf]

# Supplementary Materials: Ultrasonic Synthesis, Molecular Structure and Mechanistic Study of 1,3-Dipolar Cycloaddition Reaction of 1-Alkynylpyridinium-3-olate and Acetylene Derivatives

AsmaaAbolnaga, Mohamed Hagar and Saied M. Soliman

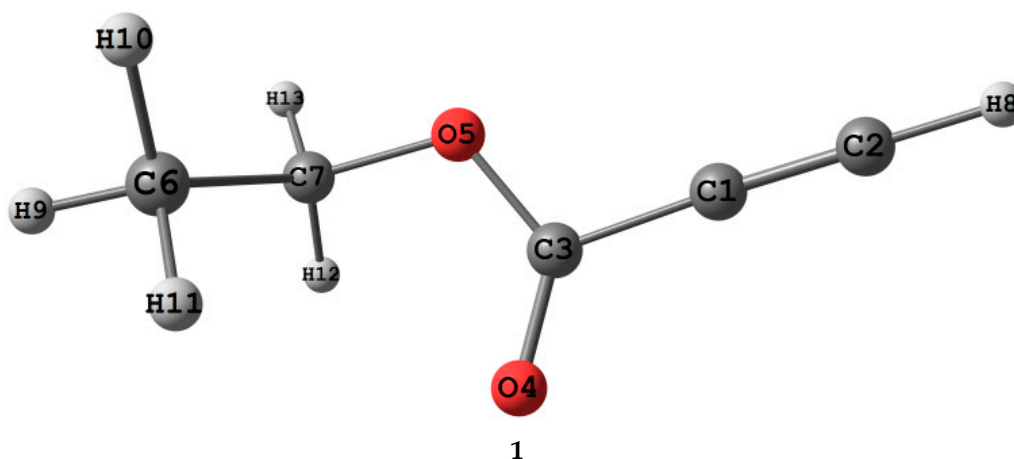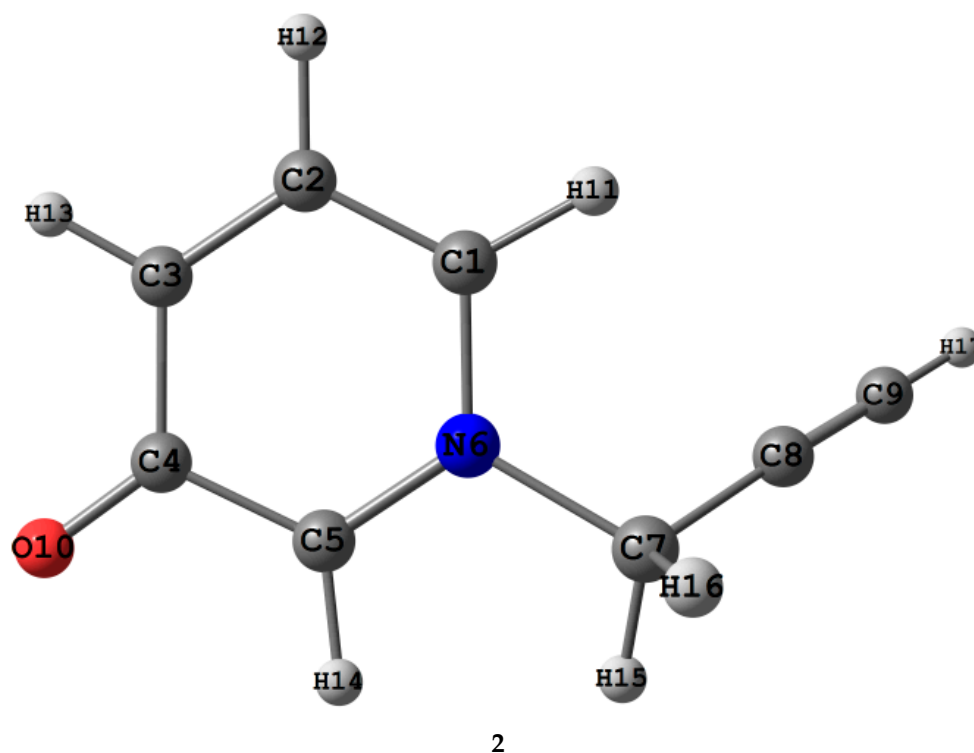

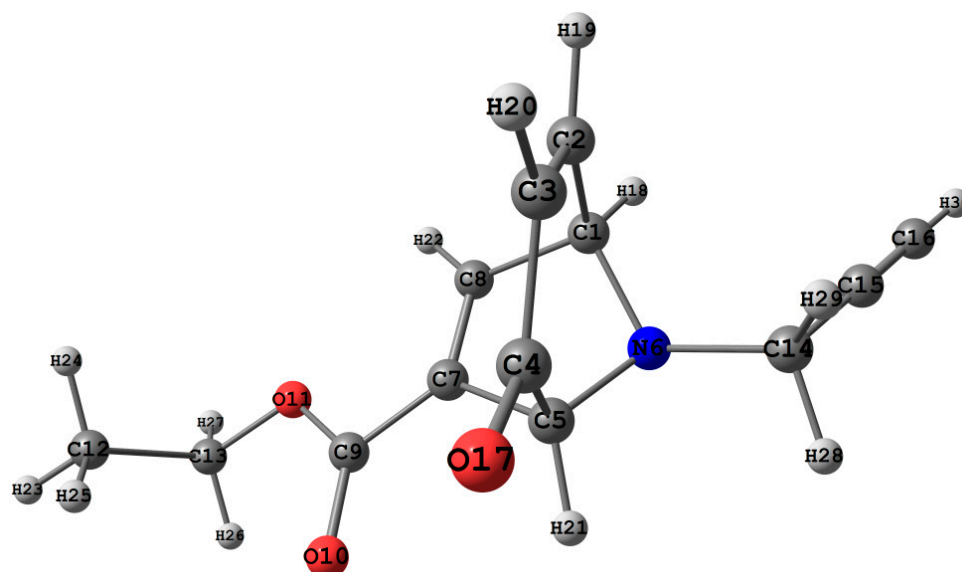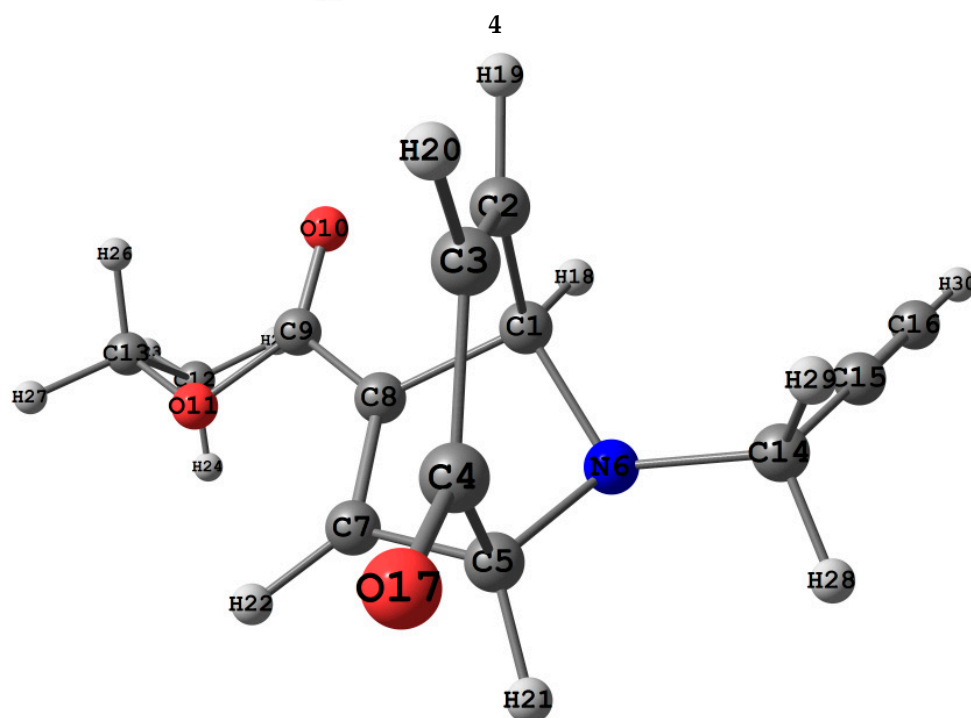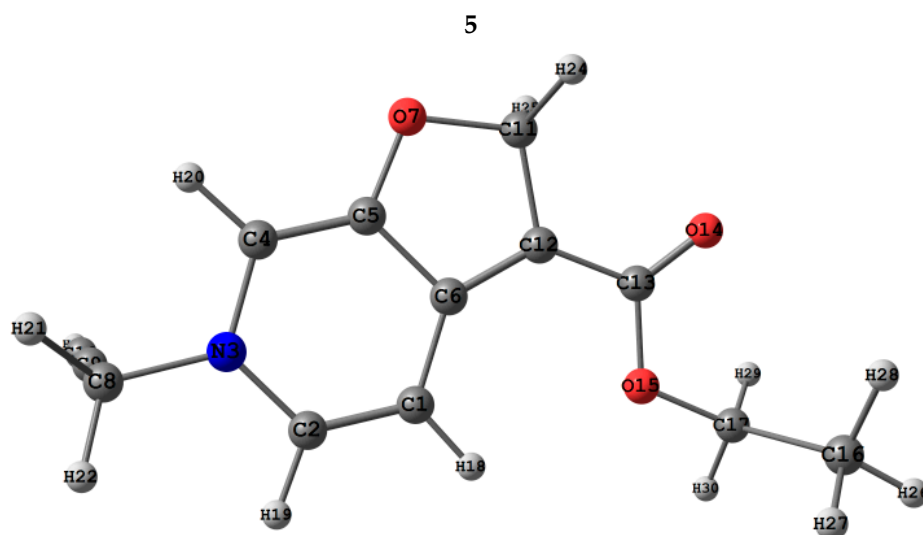

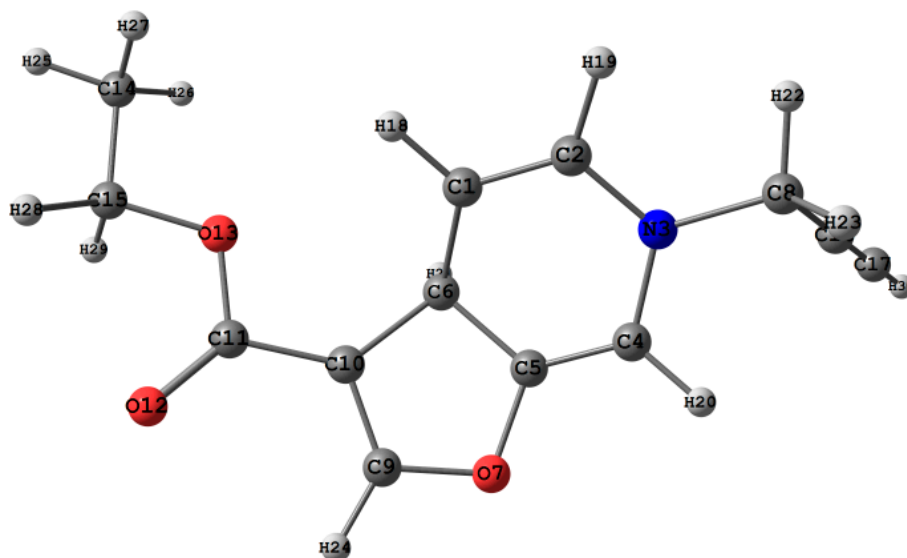

8

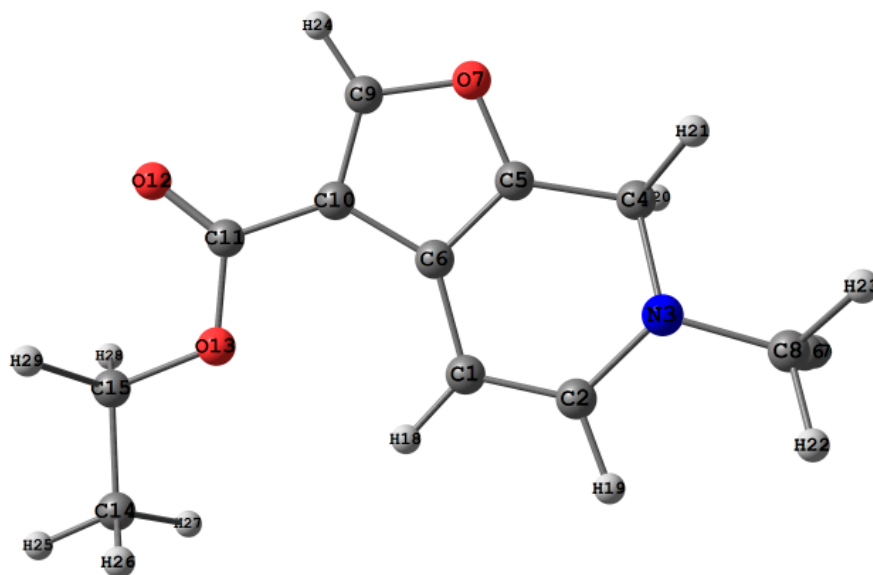

9

Figure S1. The optimized structure of the reactants.

Reactant # 1

|   |             |             |             |
|---|-------------|-------------|-------------|
| C | -1.89700000 | -0.14859000 | 0.08683200  |
| C | -3.03751500 | -0.50152500 | 0.26666500  |
| C | -0.54673700 | 0.34024000  | -0.11832600 |
| O | -0.23852600 | 1.51291000  | -0.07314000 |
| O | 0.29810000  | -0.67943100 | -0.36577200 |
| C | 2.43791800  | -0.18463100 | 0.72962600  |
| C | 1.68773300  | -0.31875600 | -0.58598100 |
| H | -4.04483100 | -0.81296200 | 0.42587400  |
| H | 3.49729800  | 0.00860700  | 0.53164700  |
| H | 2.35986400  | -1.10353700 | 1.31744600  |
| H | 2.04194800  | 0.64762600  | 1.31618100  |
| H | 1.72261000  | 0.60971400  | -1.16032300 |
| H | 2.08012300  | -1.13770800 | -1.19241900 |

## Reactant # 2

|   |              |              |              |
|---|--------------|--------------|--------------|
| C | 0.331636000  | 1.131793000  | 0.288948000  |
| C | -0.902033000 | 1.762697000  | 0.108643000  |
| C | -2.056684000 | 1.040155000  | -0.102323000 |
| C | -2.053251000 | -0.413583000 | -0.149350000 |
| C | -0.729572000 | -0.977774000 | 0.046332000  |
| N | 0.368429000  | -0.222946000 | 0.247123000  |
| C | 1.655590000  | -0.921754000 | 0.527091000  |
| C | 2.809968000  | -0.306756000 | -0.117636000 |
| C | 3.793986000  | 0.173064000  | -0.624165000 |
| O | -3.050215000 | -1.130587000 | -0.334578000 |
| H | 1.269346000  | 1.644405000  | 0.441680000  |
| H | -0.925802000 | 2.847797000  | 0.137268000  |
| H | -3.010020000 | 1.539687000  | -0.243503000 |
| H | -0.599435000 | -2.052781000 | 0.033637000  |
| H | 1.540272000  | -1.953287000 | 0.185996000  |
| H | 1.795136000  | -0.945127000 | 1.613877000  |
| H | 4.655390000  | 0.597579000  | -1.087434000 |

## Product # 4

|   |              |              |              |
|---|--------------|--------------|--------------|
| C | -1.448143000 | -0.774501000 | 0.949078000  |
| C | -1.631456000 | 0.460599000  | 1.828593000  |
| C | -1.266778000 | 1.662622000  | 1.348240000  |
| C | -0.665288000 | 1.778915000  | -0.012035000 |
| C | -0.517982000 | 0.430806000  | -0.767190000 |
| N | -1.672719000 | -0.444224000 | -0.477145000 |
| C | 0.588334000  | -0.386951000 | -0.101562000 |
| C | 0.046975000  | -1.096372000 | 0.895810000  |
| C | 1.995388000  | -0.316635000 | -0.537941000 |
| O | 2.375189000  | 0.345045000  | -1.484702000 |
| O | 2.800866000  | -1.085721000 | 0.230544000  |
| C | 4.945253000  | 0.075357000  | 0.501517000  |
| C | 4.205748000  | -1.096661000 | -0.124593000 |
| C | -2.988995000 | 0.072620000  | -0.858158000 |
| C | -4.044642000 | -0.910032000 | -0.601027000 |
| C | -4.927407000 | -1.699848000 | -0.368057000 |
| O | -0.314702000 | 2.846462000  | -0.481498000 |
| H | -2.082871000 | -1.604158000 | 1.269895000  |
| H | -2.040233000 | 0.350139000  | 2.831049000  |
| H | -1.366612000 | 2.582741000  | 1.917196000  |
| H | -0.364941000 | 0.613505000  | -1.832994000 |
| H | 0.562484000  | -1.748786000 | 1.588396000  |
| H | 6.014963000  | -0.001181000 | 0.280329000  |
| H | 4.818917000  | 0.080802000  | 1.588084000  |
| H | 4.578617000  | 1.021342000  | 0.096428000  |
| H | 4.292963000  | -1.081772000 | -1.213426000 |
| H | 4.571969000  | -2.052847000 | 0.256315000  |
| H | -2.946985000 | 0.288860000  | -1.933161000 |
| H | -3.261104000 | 1.019003000  | -0.358268000 |
| H | -5.705000000 | -2.403871000 | -0.180630000 |

## Product # 5

---

|   |              |              |              |
|---|--------------|--------------|--------------|
| C | 0.608749000  | 0.582260000  | 0.419466000  |
| C | 1.102176000  | -0.211794000 | 1.624367000  |
| C | 1.708434000  | -1.397391000 | 1.426360000  |
| C | 1.854039000  | -1.940938000 | 0.049438000  |
| C | 1.304561000  | -1.011181000 | -1.071148000 |
| N | 1.524272000  | 0.407238000  | -0.731242000 |
| C | -0.215987000 | -1.060301000 | -1.013244000 |
| C | -0.629599000 | -0.124924000 | -0.150097000 |
| C | -1.987185000 | 0.180643000  | 0.330326000  |
| O | -2.211996000 | 0.961166000  | 1.238183000  |
| O | -2.935608000 | -0.506709000 | -0.341737000 |
| C | -4.892028000 | 0.942532000  | -0.637057000 |
| C | -4.308305000 | -0.275154000 | 0.061990000  |
| C | 2.918560000  | 0.823440000  | -0.567125000 |
| C | 3.022731000  | 2.265221000  | -0.331088000 |
| C | 3.121273000  | 3.447662000  | -0.109457000 |
| O | 2.336812000  | -3.034353000 | -0.188771000 |
| H | 0.448621000  | 1.634797000  | 0.656981000  |
| H | 0.939368000  | 0.182535000  | 2.624671000  |
| H | 2.075247000  | -2.018588000 | 2.238612000  |
| H | 1.744172000  | -1.296535000 | -2.031278000 |
| H | -0.825294000 | -1.781203000 | -1.542288000 |
| H | -5.949633000 | 1.048639000  | -0.374011000 |
| H | -4.816509000 | 0.841676000  | -1.723539000 |
| H | -4.369462000 | 1.850764000  | -0.327752000 |
| H | -4.340858000 | -0.161472000 | 1.147978000  |
| H | -4.830427000 | -1.191120000 | -0.223642000 |
| H | 3.439213000  | 0.569401000  | -1.499437000 |
| H | 3.451209000  | 0.294852000  | 0.243206000  |
| H | 3.206284000  | 4.494317000  | 0.071406000  |

---

## Product # 8

---

|   |              |              |              |
|---|--------------|--------------|--------------|
| C | 1.219083000  | -2.842613000 | -0.777985000 |
| C | -1.057957000 | -2.635522000 | -0.094333000 |
| N | 0.119174000  | -3.396575000 | -0.101460000 |
| C | -1.076557000 | -1.309201000 | -0.308841000 |
| C | 1.260115000  | -1.517776000 | -0.946340000 |
| C | 0.229011000  | -0.548782000 | -0.415329000 |
| O | 2.127133000  | -0.874723000 | -1.835898000 |
| C | 0.029280000  | -4.852797000 | -0.011722000 |
| C | 1.528524000  | 0.313279000  | -2.134198000 |
| C | 0.404792000  | 0.570626000  | -1.436750000 |
| C | -0.355146000 | 1.810718000  | -1.582430000 |
| O | -0.118289000 | 2.693641000  | -2.388580000 |
| O | -1.381738000 | 1.870095000  | -0.692290000 |
| C | -3.265931000 | 2.944744000  | 0.308999000  |
| C | -2.187542000 | 3.067100000  | -0.750381000 |
| C | 1.148840000  | -5.451688000 | 0.720059000  |
| C | 2.076575000  | -5.964868000 | 1.296444000  |
| H | -2.014033000 | -0.768094000 | -0.323989000 |
| H | 0.086716000  | -1.966437000 | -3.200653000 |
| H | 1.949901000  | -3.525716000 | -1.192291000 |
| H | 0.509041000  | -0.156667000 | 0.581371000  |
| H | -0.907706000 | -5.095359000 | 0.499817000  |
| H | -0.029968000 | -5.311961000 | -1.013068000 |
| H | 2.025413000  | 0.909895000  | -2.886403000 |
| H | -3.896160000 | 3.839451000  | 0.302920000  |
| H | -2.825768000 | 2.840597000  | 1.304820000  |
| H | -3.902868000 | 2.075296000  | 0.121848000  |
| H | -2.607735000 | 3.163855000  | -1.756508000 |
| H | -1.543643000 | 3.936119000  | -0.581745000 |
| H | 2.892600000  | -6.407070000 | 1.820182000  |

---

## Product # 9

---

|   |              |              |              |
|---|--------------|--------------|--------------|
| C | -0.259705000 | -1.046552000 | -0.224994000 |
| C | -1.553582000 | -1.325787000 | -0.498612000 |
| N | -2.536300000 | -0.357759000 | -0.697055000 |
| C | -2.366050000 | 1.01919      | -0.200306000 |
| C | -0.902265000 | 1.28977      | -0.138958000 |
| C | 0.09004      | 0.35625      | -0.101748000 |
| O | -0.405919000 | 2.55795      | -0.014678000 |
| C | -3.922294000 | -0.787122000 | -0.823933000 |
| C | 0.94081      | 2.43141      | 0.09408      |
| C | 1.31377      | 1.11357      | 0.04849      |
| C | 2.71559      | 0.68083      | 0.13945      |
| O | 3.6641       | 1.43391      | 0.26029      |
| O | 2.83737      | -0.667191000 | 0.07417      |
| C | 4.11389      | -2.686924000 | 0.05685      |
| C | 4.18795      | -1.175434000 | 0.15438      |
| C | -4.641215000 | -0.920970000 | 0.45584      |
| C | -5.214596000 | -1.016073000 | 1.51462      |
| H | 0.48153      | -1.827171000 | -0.141279000 |
| H | -1.895966000 | -2.344717000 | -0.646437000 |
| H | -2.848804000 | 1.14972      | 0.78861      |
| H | -2.876538000 | 1.70867      | -0.889003000 |
| H | -3.941159000 | -1.742695000 | -1.359436000 |
| H | -4.452548000 | -0.064955000 | -1.459499000 |
| H | 1.51158      | 3.34077      | 0.19019      |
| H | 5.1206       | -3.112604000 | 0.11241      |
| H | 3.6622       | -2.996117000 | -0.890128000 |
| H | 3.51964      | -3.103440000 | 0.87528      |
| H | 4.63468      | -0.845325000 | 1.09747      |
| H | 4.77865      | -0.739264000 | -0.657225000 |
| H | -5.718248000 | -1.108764000 | 2.44929      |

---

## Product # 6

---

|   |              |              |              |
|---|--------------|--------------|--------------|
| C | 0.33516      | -1.137479000 | -0.169259000 |
| C | 1.64893      | -1.429496000 | -0.410245000 |
| N | 2.59966      | -0.467889000 | -0.614485000 |
| C | 2.25685      | 0.88635      | -0.546867000 |
| C | 0.96338      | 1.21655      | -0.306868000 |
| C | -0.071972000 | 0.23223      | -0.105042000 |
| O | 0.47574      | 2.47677      | -0.233058000 |
| C | 4.01263      | -0.831552000 | -0.753393000 |
| C | 4.77358      | -0.736878000 | 0.49676      |
| C | 5.40177      | -0.656076000 | 1.52391      |
| C | -0.959060000 | 2.39535      | 0.03329      |
| C | -1.249301000 | 0.91374      | 0.102        |
| C | -2.586844000 | 0.43888      | 0.34544      |
| O | -3.556716000 | 1.16995      | 0.50885      |
| O | -2.670695000 | -0.930036000 | 0.38127      |
| C | -4.776768000 | -1.601857000 | -0.679382000 |
| C | -3.984937000 | -1.475427000 | 0.61439      |
| H | -0.384277000 | -1.932928000 | -0.033994000 |
| H | 2.00641      | -2.451798000 | -0.458003000 |
| H | 3.04981      | 1.60616      | -0.693327000 |
| H | 4.46077      | -0.181146000 | -1.514133000 |
| H | 4.05996      | -1.851933000 | -1.147149000 |
| H | 5.9473       | -0.583359000 | 2.43683      |
| H | -1.487520000 | 2.91597      | -0.775521000 |
| H | -1.163240000 | 2.93357      | 0.96766      |
| H | -5.738023000 | -2.090047000 | -0.485226000 |
| H | -4.229781000 | -2.199928000 | -1.414631000 |
| H | -4.972341000 | -0.613732000 | -1.102293000 |
| H | -4.511668000 | -0.840451000 | 1.33078      |
| H | -3.802119000 | -2.454722000 | 1.06546      |

---



## Product # 7

---

|   |              |              |              |
|---|--------------|--------------|--------------|
| C | -1.822425000 | -0.462961000 | -0.630678000 |
| C | -1.947799000 | -1.779417000 | -0.384559000 |
| N | -0.880902000 | -2.593888000 | -0.010409000 |
| C | 0.42018      | -2.089871000 | -0.153952000 |
| C | 0.58544      | -0.774784000 | -0.337760000 |
| C | -0.531860000 | 0.2464       | -0.277009000 |
| O | 1.74615      | -0.201434000 | -0.841104000 |
| C | -1.112568000 | -3.843105000 | 0.70166      |
| C | -1.208806000 | -3.706490000 | 2.16297      |
| C | -1.287325000 | -3.585943000 | 3.36178      |
| C | 1.34113      | 0.99176      | -1.413916000 |
| C | 0.05199      | 1.2971       | -1.202400000 |
| C | 2.39673      | 1.72267      | -2.150602000 |
| O | 3.54958      | 1.35908      | -2.239296000 |
| O | 1.89517      | 2.85221      | -2.701738000 |
| C | 2.93755      | 3.17653      | -4.897413000 |
| C | 2.82748      | 3.6605       | -3.459919000 |
| H | -2.662777000 | 0.09488      | -1.029267000 |
| H | -2.890189000 | -2.303175000 | -0.517952000 |
| H | 1.2248       | -2.811939000 | -0.236990000 |
| H | -0.621262000 | 0.69778      | 0.7323       |
| H | -0.299779000 | -4.537113000 | 0.45243      |
| H | -2.035451000 | -4.291956000 | 0.31399      |
| H | -1.353267000 | -3.469404000 | 4.41896      |
| H | -0.441363000 | 2.19331      | -1.548885000 |
| H | 3.58847      | 3.84894      | -5.465990000 |
| H | 1.95571      | 3.15949      | -5.379227000 |
| H | 3.36747      | 2.17278      | -4.932604000 |
| H | 3.79882      | 3.63866      | -2.960460000 |
| H | 2.41403      | 4.67028      | -3.406700000 |

---

**TS #4**

---

|   |              |              |              |
|---|--------------|--------------|--------------|
| C | -2.024449000 | 0.67658      | 0.75245      |
| C | -1.556519000 | 2.0214       | 1.00447      |
| C | -0.504093000 | 2.53572      | 0.32266      |
| C | 0.20423      | 1.7113       | -0.656746000 |
| C | -0.444104000 | 0.42         | -0.928341000 |
| N | -1.681706000 | 0.13727      | -0.470396000 |
| C | 0.35648      | -0.617064000 | 1.20388      |
| C | -0.669721000 | -0.399894000 | 1.88074      |
| C | 1.59453      | -1.129311000 | 0.67288      |
| O | 1.70043      | -2.208363000 | 0.11246      |
| O | 2.6005       | -0.250452000 | 0.85843      |
| C | 3.88159      | -0.295808000 | -1.237569000 |
| C | 3.87509      | -0.589452000 | 0.25541      |
| C | -2.252151000 | -1.177879000 | -0.843122000 |
| C | -3.701509000 | -1.239883000 | -0.688787000 |
| C | -4.898072000 | -1.327423000 | -0.561073000 |
| O | 1.24342      | 2.04389      | -1.234581000 |
| H | -3.003940000 | 0.38589      | 1.11518      |
| H | -2.047363000 | 2.58257      | 1.79407      |
| H | -0.130441000 | 3.53834      | 0.50114      |
| H | -0.070778000 | -0.166746000 | -1.760280000 |
| H | -1.144002000 | -0.524571000 | 2.83734      |
| H | 4.90169      | -0.382897000 | -1.627046000 |
| H | 3.50622      | 0.71251      | -1.428393000 |
| H | 3.24921      | -1.009570000 | -1.770663000 |
| H | 4.09616      | -1.640249000 | 0.46057      |
| H | 4.58887      | 0.04071      | 0.79045      |
| H | -1.761791000 | -1.943362000 | -0.226398000 |
| H | -1.977719000 | -1.364281000 | -1.885338000 |
| H | -5.956862000 | -1.399539000 | -0.459464000 |

---

**TS #5**

---

|   |              |              |              |
|---|--------------|--------------|--------------|
| C | 0.75873      | 0.14962      | 1.4051       |
| C | 1.28174      | -1.160670000 | 1.55156      |
| C | 2.39446      | -1.566881000 | 0.86725      |
| C | 2.97092      | -0.714028000 | -0.159618000 |
| C | 2.21783      | 0.55567      | -0.365974000 |
| N | 1.43816      | 1.04469      | 0.65814      |
| C | 0.87304      | -0.220459000 | -1.603504000 |
| C | -0.207006000 | -0.561662000 | -1.083170000 |
| C | -1.465613000 | -1.068497000 | -0.633297000 |
| O | -1.644484000 | -2.190795000 | -0.186794000 |
| O | -2.459359000 | -0.146420000 | -0.784389000 |
| C | -3.981674000 | -0.377277000 | 1.12747      |
| C | -3.776602000 | -0.570932000 | -0.367953000 |
| C | 1.02406      | 2.46443      | 0.65502      |
| C | -0.235021000 | 2.72883      | -0.038296000 |
| C | -1.282126000 | 2.96937      | -0.585827000 |
| O | 3.92913      | -1.000224000 | -0.880685000 |
| H | -0.020051000 | 0.53418      | 2.0512       |
| H | 0.78214      | -1.823670000 | 2.24973      |
| H | 2.8468       | -2.538101000 | 1.03499      |
| H | 2.73177      | 1.30938      | -0.954895000 |
| H | 1.45907      | -0.266801000 | -2.507668000 |
| H | -5.013881000 | -0.622862000 | 1.39895      |
| H | -3.788442000 | 0.66058      | 1.41556      |
| H | -3.314737000 | -1.033947000 | 1.6912       |
| H | -3.920874000 | -1.616374000 | -0.650190000 |
| H | -4.458641000 | 0.05642      | -0.947620000 |
| H | 1.84167      | 3.03461      | 0.20462      |
| H | 0.95314      | 2.78301      | 1.70076      |
| H | -2.203701000 | 3.14511      | -1.091107000 |

---

**TS #6**

---

|   |              |              |              |
|---|--------------|--------------|--------------|
| C | -0.683193000 | -1.396893000 | -0.410911000 |
| C | -1.903594000 | -1.486157000 | 0.22524      |
| N | -2.623337000 | -0.356063000 | 0.46834      |
| C | -2.139856000 | 0.87161      | 0.13498      |
| C | -0.929322000 | 1.02137      | -0.539196000 |
| C | -0.171419000 | -0.158121000 | -0.818086000 |
| O | -0.494054000 | 2.21977      | -0.823635000 |
| C | -3.977666000 | -0.465032000 | 1.05952      |
| C | 1.1102       | 2.3984       | -0.327741000 |
| C | 1.7392       | 1.41175      | 0.14217      |
| C | 2.68737      | 0.54163      | 0.71416      |
| O | 2.8776       | 0.33565      | 1.90699      |
| O | 3.39039      | -0.133835000 | -0.266864000 |
| C | 5.06694      | -1.664694000 | -0.985930000 |
| C | 4.38642      | -1.045059000 | 0.22199      |
| C | -5.026830000 | -0.601753000 | 0.05215      |
| C | -5.899294000 | -0.714822000 | -0.773048000 |
| H | -0.139811000 | -2.311884000 | -0.618204000 |
| H | -2.360046000 | -2.422089000 | 0.51901      |
| H | -2.741176000 | 1.73203      | 0.39816      |
| H | 0.69038      | -0.108731000 | -1.465525000 |
| H | -3.974204000 | -1.324465000 | 1.73676      |
| H | -4.142682000 | 0.4256       | 1.6735       |
| H | 1.21297      | 3.44857      | -0.550189000 |
| H | 5.83846      | -2.371645000 | -0.663692000 |
| H | 5.53996      | -0.895361000 | -1.603197000 |
| H | 4.34541      | -2.203148000 | -1.608227000 |
| H | 3.91364      | -1.805480000 | 0.85441      |
| H | 5.10015      | -0.505485000 | 0.85416      |
| H | -6.664970000 | -0.811468000 | -1.508920000 |

---

**TS #7**

---

|   |              |              |              |
|---|--------------|--------------|--------------|
| C | -1.939153000 | 2.12427      | -0.007136000 |
| C | -2.816499000 | 1.23253      | -0.550298000 |
| N | -2.560028000 | -0.116338000 | -0.514743000 |
| C | -1.412280000 | -0.597902000 | 0.03711      |
| C | -0.465282000 | 0.23985      | 0.6576       |
| C | -0.675926000 | 1.70418      | 0.55665      |
| O | 0.61195      | -0.187271000 | 1.14976      |
| C | -3.591787000 | -1.059594000 | -0.987097000 |
| C | -4.569766000 | -1.408841000 | 0.04371      |
| C | -5.382874000 | -1.698807000 | 0.88652      |
| C | 1.79475      | 1.36416      | -0.219226000 |
| C | 0.81449      | 2.12696      | -0.419345000 |
| C | 2.97818      | 0.58745      | 0.00103      |
| O | 3.79908      | 0.81831      | 0.87157      |
| O | 3.08163      | -0.414112000 | -0.910859000 |
| C | 3.92077      | -2.375073000 | 0.29352      |
| C | 4.21237      | -1.297839000 | -0.740878000 |
| H | -2.211747000 | 3.17505      | -0.009803000 |
| H | -3.770205000 | 1.52058      | -0.973995000 |
| H | -1.277851000 | -1.672170000 | 0.04559      |
| H | -0.350178000 | 2.26847      | 1.43101      |
| H | -3.081163000 | -1.956396000 | -1.351578000 |
| H | -4.091099000 | -0.605921000 | -1.849401000 |
| H | -6.092812000 | -1.952445000 | 1.64032      |
| H | 0.63719      | 3.02463      | -0.990403000 |
| H | 4.76495      | -3.070490000 | 0.3554       |
| H | 3.02396      | -2.939590000 | 0.02313      |
| H | 3.76666      | -1.926548000 | 1.27725      |
| H | 5.08744      | -0.707468000 | -0.457528000 |
| H | 4.37181      | -1.726772000 | -1.733523000 |

---
